# Supplementary material for: People with amyotrophic lateral sclerosis and their caregivers: what matters most?
Source: HighWire-hosted journal article supplement (doi:10.1136/bmjspcare-2020-002741), 2021-04-08
Supplement: bmjspcare-2020-002741supp001_data_supplement.pdf [file bmjspcare-2020-002741supp001_data_supplement.pdf]

**Table S-I- Density of expression: median number of words ( $\pm 95\%$  CI) pronounced per need, emotion or medical requirement expressed**

| Item                        |              | Mild Disease (MD)                                | Intermediate Spinal (IS) | Intermediate Bulbar (IB) | Severe Disease (SD) | Total            | P [a] |  |
|-----------------------------|--------------|--------------------------------------------------|--------------------------|--------------------------|---------------------|------------------|-------|--|
| <b>Needs</b>                | carers       | 149<br>[86-207]                                  | 199<br>[174-378]         | 536<br>[283-697]         | 150<br>[112-233]    | 184<br>[142-233] | 0.489 |  |
|                             | patients     | 159<br>[70-236]                                  | 166<br>[82-366]          | –                        | –                   | 165<br>[82-236]  |       |  |
|                             | <b>total</b> | 157<br>[93-207]                                  | 186<br>[158-366]         | 536<br>[283-697]         | 150<br>[112-233]    | 170<br>[142-207] |       |  |
|                             | P [b]        | 0.022                                            |                          |                          |                     |                  |       |  |
|                             | P [c]        | status=0.935; burden=0.003; interaction=0.684    |                          |                          |                     |                  |       |  |
| <b>Emotions</b>             | carers       | 88<br>[67-135]                                   | 248<br>[158-347]         | 570<br>[373-697]         | 107<br>[69-190]     | 112<br>[92-190]  | 0.126 |  |
|                             | patients     | 77<br>[51-118]                                   | 157<br>[82-228]          | –                        | –                   | 82<br>[61-130]   |       |  |
|                             | <b>total</b> | 83<br>[67-104]                                   | 203<br>[95-304]          | 570<br>[373-697]         | 107<br>[69-190]     | 102<br>[84-138]  |       |  |
|                             | P [b]        | <0.001                                           |                          |                          |                     |                  |       |  |
|                             | P [c]        | status=0.309; burden = <0.001; interaction=0.871 |                          |                          |                     |                  |       |  |
| <b>Medical Requirements</b> | carers       | 193<br>[86-303]                                  | 347<br>[166-541]         | 264<br>[188-574]         | 203<br>[90-294]     | 203<br>[177-294] | 0.968 |  |
|                             | patients     | 254<br>[130-412]                                 | 220<br>[82-228]          | –                        | –                   | 228<br>[130-276] |       |  |
|                             | <b>total</b> | 205<br>[138-297]                                 | 224<br>[158-378]         | 264<br>[188-574]         | 203<br>[90-294]     | 213<br>[177-267] |       |  |
|                             | P [b]        | 0.596                                            |                          |                          |                     |                  |       |  |
|                             | P [c]        | status=0.923; burden =0.832; interaction=0.144   |                          |                          |                     |                  |       |  |

[a] Mann-Whitney test for status

[b] Kruskal-Wallis test for burden

[c] bootstrapping ANOVA (2000 replicates)

**Table S-II – Number of subjects expressing needs and number of expressions per subject, stratified by status**

| Need                          | Number of subjects expressing (% of subjects) |           |          | total number of expressions (% of total expressions) |            | mean number of expressions per expressing subject |          |
|-------------------------------|-----------------------------------------------|-----------|----------|------------------------------------------------------|------------|---------------------------------------------------|----------|
|                               | carers                                        | patients  | Fisher P | carers                                               | patients   | carers                                            | patients |
| <b>Assistance</b>             | 12 (36.4%)                                    | 7 (63.6%) | 0.1639   | 24 (19.5%)                                           | 14 (28.6%) | 2.00                                              | 2.00     |
| <b>Reference Person</b>       | 10 (30.3%)                                    | 2 (18.2%) | 0.6983   | 18 (14.6%)                                           | 2 (4.1%)   | 1.80                                              | 1.00     |
| <b>Knowledge</b>              | 6 (18.2%)                                     | 6 (54.5%) | 0.0451   | 6 (4.9%)                                             | 7 (14.3%)  | 1.00                                              | 1.17     |
| <b>Planning</b>               | 10 (30.3%)                                    | 1 (9.1%)  | 0.2409   | 13 (10.6%)                                           | 2 (4.1%)   | 1.30                                              | 2.00     |
| <b>Support</b>                | 7 (21.2%)                                     | 3 (27.3%) | 0.6922   | 10 (8.1%)                                            | 4 (8.2%)   | 1.43                                              | 1.33     |
| <b>Scientific Advancement</b> | 4 (12.1%)                                     | 2 (18.2%) | 0.6302   | 9 (7.3%)                                             | 3 (6.1%)   | 2.25                                              | 1.50     |
| <b>Autonomy</b>               | 4 (12.1%)                                     | 2 (18.2%) | 0.6302   | 4 (3.3%)                                             | 2 (4.1%)   | 1.00                                              | 1.00     |
| <b>Clarity</b>                | 4 (12.1%)                                     | 1 (9.1%)  | 1.0000   | 7 (5.7%)                                             | 2 (4.1%)   | 1.75                                              | 2.00     |
| <b>Comprehension</b>          | 3 (9.1%)                                      | 2 (18.2%) | 0.5855   | 3 (2.4%)                                             | 2 (4.1%)   | 1.00                                              | 1.00     |
| <b>Outpouring</b>             | 4 (12.1%)                                     | 1 (9.1%)  | 1.0000   | 4 (3.3%)                                             | 1 (2.0%)   | 1.00                                              | 1.00     |
| <b>Sharing</b>                | 4 (12.1%)                                     | 1 (9.1%)  | 1.0000   | 4 (3.3%)                                             | 1 (2.0%)   | 1.00                                              | 1.00     |
| <b>Relying</b>                | 2 (6.1%)                                      | 2 (18.2%) | 0.2565   | 2 (1.6%)                                             | 3 (6.1%)   | 1.00                                              | 1.50     |
| <b>Listening</b>              | 3 (9.1%)                                      | 1 (9.1%)  | 1.0000   | 3 (2.4%)                                             | 1 (2.0%)   | 1.00                                              | 1.00     |
| <b>Belonging/Normality</b>    | 3 (9.1%)                                      | 0 (0.0%)  | 0.5615   | 7 (5.7%)                                             | 0 (0.0%)   | 2.33                                              | .        |
| <b>Doing</b>                  | 2 (6.1%)                                      | 1 (9.1%)  | 1.0000   | 2 (1.6%)                                             | 3 (6.1%)   | 1.00                                              | 3.00     |
| <b>Reassurance</b>            | 3 (9.1%)                                      | 0 (0.0%)  | 0.5615   | 4 (3.3%)                                             | 0 (0.0%)   | 1.33                                              | .        |
| <b>Control/Power</b>          | 2 (6.1%)                                      | 1 (9.1%)  | 1.0000   | 2 (1.6%)                                             | 1 (2.0%)   | 1.00                                              | 1.00     |
| <b>Respect</b>                | 1 (3.0%)                                      | 1 (9.1%)  | 0.4419   | 1 (0.8%)                                             | 1 (2.0%)   | 1.00                                              | 1.00     |
| <b>Total</b>                  | 33                                            | 11        |          | 123                                                  | 49         | 1.46                                              | 1.44     |

Table S-III - Number of subjects expressing needs, stratified by disease burden

| Need                   | Number of subjects expressing (% of subjects) |                          |                          |                     | chi square<br>P |
|------------------------|-----------------------------------------------|--------------------------|--------------------------|---------------------|-----------------|
|                        | Mild Disease (MD)                             | Intermediate Spinal (IS) | Intermediate Bulbar (IB) | Severe Disease (SD) |                 |
| Assistance             | 8 (40.0%)                                     | 4 (50.0%)                | 2 (50.0%)                | 5 (41.7%)           | 0.9560          |
| Reference Person       | 4 (20.0%)                                     | 1 (12.5%)                | 2 (50.0%)                | 5 (41.7%)           | 0.2947          |
| Knowledge              | 5 (25.0%)                                     | 2 (25.0%)                | 1 (25.0%)                | 4 (33.3%)           | 0.9590          |
| Planning               | 5 (25.0%)                                     | 0 (0.0%)                 | 2 (50.0%)                | 4 (33.3%)           | 0.2173          |
| Support                | 3 (15.0%)                                     | 3 (37.5%)                | 0 (0.0%)                 | 4 (33.3%)           | 0.3056          |
| Scientific Advancement | 4 (20.0%)                                     | 0 (0.0%)                 | 0 (0.0%)                 | 2 (16.7%)           | 0.4443          |
| Autonomy               | 3 (15.0%)                                     | 1 (12.5%)                | 0 (0.0%)                 | 2 (16.7%)           | 0.8577          |
| Clarity                | 2 (10.0%)                                     | 0 (0.0%)                 | 0 (0.0%)                 | 3 (25.0%)           | 0.2850          |
| Comprehension          | 2 (10.0%)                                     | 0 (0.0%)                 | 0 (0.0%)                 | 3 (25.0%)           | 0.2850          |
| Outpouring             | 4 (20.0%)                                     | 0 (0.0%)                 | 0 (0.0%)                 | 1 (8.3%)            | 0.3722          |
| Sharing                | 1 (5.0%)                                      | 2 (25.0%)                | 0 (0.0%)                 | 2 (16.7%)           | 0.3722          |
| Relying                | 1 (5.0%)                                      | 2 (25.0%)                | 0 (0.0%)                 | 1 (8.3%)            | 0.3528          |
| Listening              | 0 (0.0%)                                      | 2 (25.0%)                | 1 (25.0%)                | 1 (8.3%)            | 0.1281          |
| Belonging/Normality    | 2 (10.0%)                                     | 0 (0.0%)                 | 0 (0.0%)                 | 1 (8.3%)            | 0.7434          |
| Doing                  | 0 (0.0%)                                      | 1 (12.5%)                | 1 (25.0%)                | 1 (8.3%)            | 0.2620          |
| Reassurance            | 1 (5.0%)                                      | 1 (12.5%)                | 0 (0.0%)                 | 1 (8.3%)            | 0.8383          |
| Control/Power          | 2 (10.0%)                                     | 1 (12.5%)                | 0 (0.0%)                 | 0 (0.0%)            | 0.5943          |
| Respect                | 1 (5.0%)                                      | 0 (0.0%)                 | 0 (0.0%)                 | 1 (8.3%)            | 0.8066          |
| <b>Total</b>           | 20                                            | 8                        | 4                        | 12                  |                 |

**Table S-IV – Number of subjects expressing emotions, number of expressions stratified by status**

| Emotion                     | Number of subjects expressing<br>(% of total subjects) |           |          | Number of expression<br>(% of total expressions) |            | mean number of<br>expressions<br>per subject<br>expressing |         |
|-----------------------------|--------------------------------------------------------|-----------|----------|--------------------------------------------------|------------|------------------------------------------------------------|---------|
|                             | carer                                                  | patient   | Fisher P | carer                                            | patient    | carer                                                      | patient |
| <b>Desperation</b>          | 16 (48.5%)                                             | 5 (45.5%) | 1.0000   | 29 (19.3%)                                       | 7 (7.1%)   | 1.81                                                       | 1.40    |
| <b>Anger</b>                | 12 (36.4%)                                             | 8 (72.7%) | 0.0777   | 34 (22.7%)                                       | 34 (34.3%) | 2.83                                                       | 4.25    |
| <b>Sadness</b>              | 12 (36.4%)                                             | 6 (54.5%) | 0.3141   | 18 (12.0%)                                       | 12 (12.1%) | 1.50                                                       | 2.00    |
| <b>Fear</b>                 | 12 (36.4%)                                             | 5 (45.5%) | 0.7244   | 12 (8.0%)                                        | 8 (8.1%)   | 1.00                                                       | 1.60    |
| <b>Disorientation</b>       | 7 (21.2%)                                              | 4 (36.4%) | 0.4247   | 10 (6.7%)                                        | 9 (9.1%)   | 1.43                                                       | 2.25    |
| <b>Anxiety/Apprehension</b> | 8 (24.2%)                                              | 1 (9.1%)  | 0.4108   | 10 (6.7%)                                        | 1 (1.0%)   | 1.25                                                       | 1.00    |
| <b>Resignation</b>          | 6 (18.2%)                                              | 3 (27.3%) | 0.6686   | 6 (4.0%)                                         | 4 (4.0%)   | 1.00                                                       | 1.33    |
| <b>Frustration</b>          | 4 (12.1%)                                              | 2 (18.2%) | 0.6302   | 4 (2.7%)                                         | 3 (3.0%)   | 1.00                                                       | 1.50    |
| <b>Hope</b>                 | 3 (9.1%)                                               | 2 (18.2%) | 0.5855   | 5 (3.3%)                                         | 3 (3.0%)   | 1.67                                                       | 1.50    |
| <b>Sarcasm</b>              | 1 (3.0%)                                               | 4 (36.4%) | 0.0105   | 1 (0.7%)                                         | 7 (7.1%)   | 1.00                                                       | 1.75    |
| <b>Gratitude</b>            | 4 (12.1%)                                              | 1 (9.1%)  | 1.0000   | 5 (3.3%)                                         | 1 (1.0%)   | 1.25                                                       | 1.00    |
| <b>Rejection</b>            | 4 (12.1%)                                              | 1 (9.1%)  | 1.0000   | 4 (2.7%)                                         | 1 (1.0%)   | 1.00                                                       | 1.00    |
| <b>Acceptance</b>           | 3 (9.1%)                                               | 1 (9.1%)  | 1.0000   | 4 (2.7%)                                         | 1 (1.0%)   | 1.33                                                       | 1.00    |
| <b>Disappointment</b>       | 2 (6.1%)                                               | 2 (18.2%) | 0.2565   | 2 (1.3%)                                         | 3 (3.0%)   | 1.00                                                       | 1.50    |
| <b>Exasperation</b>         | 3 (9.1%)                                               | 1 (9.1%)  | 1.0000   | 4 (2.7%)                                         | 1 (1.0%)   | 1.33                                                       | 1.00    |
| <b>Renunciation</b>         | 1 (3.0%)                                               | 2 (18.2%) | 0.1495   | 1 (0.7%)                                         | 2 (2.0%)   | 1.00                                                       | 1.00    |
| <b>Surprise</b>             | 0 (0.0%)                                               | 1 (9.1%)  | 0.2500   | 0 (0.0%)                                         | 2 (2.0%)   | .                                                          | 2.00    |
| <b>Pride</b>                | 1 (3.0%)                                               | 0 (0.0%)  | 1.0000   | 1 (0.7%)                                         | 0 (0.0%)   | 1.00                                                       | .       |
| <b>Total</b>                | 33                                                     | 11        |          | 150                                              | 99         | 1.52                                                       | 2.02    |

**Table S-V– Number of subjects expressing emotions, stratified by disease burden**

| Emotion              | N° of subjects expressing (% of total subjects) |                             |                             |                        | chi square<br>P |
|----------------------|-------------------------------------------------|-----------------------------|-----------------------------|------------------------|-----------------|
|                      | Mild Disease<br>(MD)                            | Intermediate<br>Spinal (IS) | Intermediate<br>Bulbar (IB) | Severe Disease<br>(SD) |                 |
| Desperation          | 9 (45.0%)                                       | 3 (37.5%)                   | 0 (0.0%)                    | 9 (75.0%)              | 0.0544          |
| Anger                | 9 (45.0%)                                       | 1 (12.5%)                   | 2 (50.0%)                   | 8 (66.7%)              | 0.1262          |
| Sadness              | 12 (60.0%)                                      | 0 (0.0%)                    | 0 (0.0%)                    | 6 (50.0%)              | 0.0084          |
| Fear                 | 7 (35.0%)                                       | 5 (62.5%)                   | 1 (25.0%)                   | 4 (33.3%)              | 0.4772          |
| Disorientation       | 6 (30.0%)                                       | 0 (0.0%)                    | 0 (0.0%)                    | 5 (41.7%)              | 0.1095          |
| Anxiety/Apprehension | 6 (30.0%)                                       | 3 (37.5%)                   | 0 (0.0%)                    | 0 (0.0%)               | 0.0835          |
| Resignation          | 5 (25.0%)                                       | 2 (25.0%)                   | 0 (0.0%)                    | 2 (16.7%)              | 0.6846          |
| Frustration          | 2 (10.0%)                                       | 2 (25.0%)                   | 1 (25.0%)                   | 1 (8.3%)               | 0.6091          |
| Hope                 | 2 (10.0%)                                       | 2 (25.0%)                   | 0 (0.0%)                    | 1 (8.3%)               | 0.5447          |
| Sarcasm              | 3 (15.0%)                                       | 1 (12.5%)                   | 0 (0.0%)                    | 1 (8.3%)               | 0.8266          |
| Gratitude            | 1 (5.0%)                                        | 2 (25.0%)                   | 1 (25.0%)                   | 1 (8.3%)               | 0.3722          |
| Rejection            | 4 (20.0%)                                       | 0 (0.0%)                    | 0 (0.0%)                    | 1 (8.3%)               | 0.3722          |
| Acceptance           | 2 (10.0%)                                       | 0 (0.0%)                    | 2 (50.0%)                   | 0 (0.0%)               | 0.0176          |
| Disappointment       | 3 (15.0%)                                       | 0 (0.0%)                    | 0 (0.0%)                    | 1 (8.3%)               | 0.5614          |
| Exasperation         | 1 (5.0%)                                        | 0 (0.0%)                    | 1 (25.0%)                   | 2 (16.7%)              | 0.3528          |
| Renunciation         | 1 (5.0%)                                        | 1 (12.5%)                   | 0 (0.0%)                    | 1 (8.3%)               | 0.8383          |
| Surprise             | 1 (5.0%)                                        | 0 (0.0%)                    | 0 (0.0%)                    | 0 (0.0%)               | 0.7463          |
| Pride                | 0 (0.0%)                                        | 0 (0.0%)                    | 0 (0.0%)                    | 1 (8.3%)               | 0.4354          |
| Total                | 20                                              | 8                           | 4                           | 12                     |                 |

**Table S-VI - Number of subjects expressing medical requirements and number of expressions per subject, stratified by status**

| Medical Requirements            | N° of subjects expressing<br>(% of total subjects) |           |             | N° of expression<br>(% of total expressions) |           |
|---------------------------------|----------------------------------------------------|-----------|-------------|----------------------------------------------|-----------|
|                                 | carer                                              | patient   | Fisher<br>P | carer                                        | patient   |
| <b>Difficult Communication</b>  | 11 (33.3%)                                         | 4 (36.4%) | 1.0000      | 13 (13.7%)                                   | 7 (18.9%) |
| <b>Welfare Assistance</b>       | 8 (24.2%)                                          | 3 (27.3%) | 1.0000      | 10 (10.5%)                                   | 5 (13.5%) |
| <b>Psychological Support</b>    | 9 (27.3%)                                          | 1 (9.1%)  | 0.4082      | 17 (17.9%)                                   | 1 (2.7%)  |
| <b>New Drug Research</b>        | 5 (15.2%)                                          | 3 (27.3%) | 0.3911      | 6 (6.3%)                                     | 6 (16.2%) |
| <b>Architectural Barriers</b>   | 4 (12.1%)                                          | 2 (18.2%) | 0.6302      | 4 (4.2%)                                     | 3 (8.1%)  |
| <b>Rehabilitation</b>           | 1 (3.0%)                                           | 4 (36.4%) | 0.0105      | 1 (1.1%)                                     | 8 (21.6%) |
| <b>PEG Aids</b>                 | 5 (15.2%)                                          | 0 (0.0%)  | 0.3092      | 6 (6.3%)                                     | 0 (0.0%)  |
| <b>Dedicated Home Staff</b>     | 4 (12.1%)                                          | 1 (9.1%)  | 1.0000      | 4 (4.2%)                                     | 1 (2.7%)  |
| <b>Correct Information</b>      | 3 (9.1%)                                           | 1 (9.1%)  | 1.0000      | 6 (6.3%)                                     | 1 (2.7%)  |
| <b>Reference Persons</b>        | 3 (9.1%)                                           | 1 (9.1%)  | 1.0000      | 5 (5.3%)                                     | 1 (2.7%)  |
| <b>Tracheal Aids</b>            | 2 (6.1%)                                           | 2 (18.2%) | 0.2565      | 3 (3.2%)                                     | 3 (8.1%)  |
| <b>Territorial Services</b>     | 3 (9.1%)                                           | 0 (0.0%)  | 0.5615      | 7 (7.4%)                                     | 0 (0.0%)  |
| <b>Care Integration</b>         | 3 (9.1%)                                           | 0 (0.0%)  | 0.5615      | 5 (5.3%)                                     | 0 (0.0%)  |
| <b>Psychological Problems</b>   | 3 (9.1%)                                           | 0 (0.0%)  | 0.5615      | 5 (5.3%)                                     | 0 (0.0%)  |
| <b>Dedicated Hospital Staff</b> | 2 (6.1%)                                           | 0 (0.0%)  | 1.0000      | 2 (2.1%)                                     | 0 (0.0%)  |
| <b>Autonomy</b>                 | 1 (3.0%)                                           | 0 (0.0%)  | 1.0000      | 1 (1.1%)                                     | 0 (0.0%)  |
| <b>Euthanasia</b>               | 0 (0.0%)                                           | 1 (9.1%)  | 0.2500      | 0 (0.0%)                                     | 1 (2.7%)  |
| <b>Total</b>                    | 33                                                 | 11        |             | 95                                           | 37        |

Table S-VII – Number of subjects expressing medical requirements, stratified by burden

| Medical Requirements            | N° of subjects expressing (% of total subjects) |                          |                          |                     | chi square P |
|---------------------------------|-------------------------------------------------|--------------------------|--------------------------|---------------------|--------------|
|                                 | Mild Disease (MD)                               | Intermediate Spinal (IS) | Intermediate Bulbar (IB) | Severe Disease (SD) |              |
| <b>Difficult Communication</b>  | 4 (20.0%)                                       | 4 (50.0%)                | 2 (50.0%)                | 5 (41.7%)           | 0.3305       |
| <b>Welfare Assistance</b>       | 5 (25.0%)                                       | 1 (12.5%)                | 1 (25.0%)                | 4 (33.3%)           | 0.7744       |
| <b>Psychological Support</b>    | 2 (10.0%)                                       | 3 (37.5%)                | 1 (25.0%)                | 4 (33.3%)           | 0.3056       |
| <b>New Drug Research</b>        | 3 (15.0%)                                       | 2 (25.0%)                | 0 (0.0%)                 | 3 (25.0%)           | 0.6481       |
| <b>Architectural Barriers</b>   | 3 (15.0%)                                       | 1 (12.5%)                | 0 (0.0%)                 | 2 (16.7%)           | 0.8577       |
| <b>Rehabilitation</b>           | 4 (20.0%)                                       | 1 (12.5%)                | 0 (0.0%)                 | 0 (0.0%)            | 0.3153       |
| <b>PEG Aids</b>                 | 0 (0.0%)                                        | 1 (12.5%)                | 2 (50.0%)                | 2 (16.7%)           | 0.0315       |
| <b>Dedicated Home Staff</b>     | 1 (5.0%)                                        | 1 (12.5%)                | 0 (0.0%)                 | 3 (25.0%)           | 0.3153       |
| <b>Correct Information</b>      | 0 (0.0%)                                        | 1 (12.5%)                | 1 (25.0%)                | 2 (16.7%)           | 0.2436       |
| <b>Reference Persons</b>        | 0 (0.0%)                                        | 1 (12.5%)                | 1 (25.0%)                | 2 (16.7%)           | 0.2436       |
| <b>Tracheal Aids</b>            | 3 (15.0%)                                       | 0 (0.0%)                 | 1 (25.0%)                | 0 (0.0%)            | 0.2540       |
| <b>Territorial Services</b>     | 0 (0.0%)                                        | 0 (0.0%)                 | 0 (0.0%)                 | 3 (25.0%)           | 0.0353       |
| <b>Care Integration</b>         | 0 (0.0%)                                        | 0 (0.0%)                 | 2 (50.0%)                | 1 (8.3%)            | 0.0031       |
| <b>Psychological Problems</b>   | 1 (5.0%)                                        | 0 (0.0%)                 | 0 (0.0%)                 | 2 (16.7%)           | 0.4212       |
| <b>Dedicated Hospital Staff</b> | 0 (0.0%)                                        | 0 (0.0%)                 | 0 (0.0%)                 | 2 (16.7%)           | 0.1335       |
| <b>Autonomy</b>                 | 0 (0.0%)                                        | 1 (12.5%)                | 0 (0.0%)                 | 0 (0.0%)            | 0.2031       |
| <b>Euthanasia</b>               | 1 (5.0%)                                        | 0 (0.0%)                 | 0 (0.0%)                 | 0 (0.0%)            | 0.7463       |
| <b>Total</b>                    | 20                                              | 8                        | 4                        | 12                  |              |
